# Supplementary material for: High photosensitivity and broad spectral response of multi-layered germanium sulfide transistors
Source: Royal Society of Chemistry journal article supplement (doi:10.1039/c5nr05988g), 2015-12-22
Supplement: c5nr05988g1.pdf [file c5nr05988g1.pdf]

## Supplementary information

### High photosensitivity and broad spectral response of multi-layered germanium sulfide transistors

Rajesh Kumar Ulaganathan,<sup>a,b,c</sup> Yi-Ying Lu,<sup>a,b</sup> Chia-Jung Kuo,<sup>a,b</sup> Srinivasa Reddy Tamalampudi,<sup>b,c,d</sup> Raman Sankar,<sup>e</sup> Karunakara Moorthy Boopathi,<sup>c,f</sup> Ankur Anand,<sup>b,c,f</sup> Kanchan Yadav,<sup>a,b,c</sup> Roshan Jesus Mathew,<sup>b,c,f</sup> Chia-Rung Liu,<sup>a,b</sup> Fang Cheng Chou<sup>e</sup> and Yit-Tsong Chen<sup>\*a,b</sup>

<sup>a</sup>Department of Chemistry, National Taiwan University, Taipei 10617, Taiwan

<sup>b</sup>Institute of Atomic and Molecular Sciences, Academia Sinica, Taipei 10617, Taiwan

<sup>c</sup>Nano Science and Technology Program and Molecular Science and Technology Program, Taiwan International Graduate Program, Academia Sinica, Nankang 11529, Taiwan

<sup>d</sup>Department of Physics, National Central University, Jungli 32001, Taiwan

<sup>e</sup>Center for Condensed Matter Sciences, National Taiwan University, Taipei 10617, Taiwan

<sup>f</sup>Department of Engineering and System Science, National Tsing Hua University, Hsinchu 30013, Taiwan

\*E-mail: ytchem@ntu.edu.tw

**Table S1.** Summary of performance metrics of the IV- VI group-based 2D photodetectors

| Materials                      | Spectral window | Channel thickness/ length | Measurement condition                                                  | Incident power                                                | $R_\lambda$ (A/W)                      | $\tau_l/\tau_t$           | EQE (%)            | $D^*$ (Jones)         | Response time | Ref.      |
|--------------------------------|-----------------|---------------------------|------------------------------------------------------------------------|---------------------------------------------------------------|----------------------------------------|---------------------------|--------------------|-----------------------|---------------|-----------|
| Multi-layered SnS <sub>2</sub> | Visible         | ~80 nm/<br>2 $\mu$ m      | $V_g = 0$ V<br>$V_{ds} = 2$ V                                          | 0.24 $\mu$ W                                                  | $8.8 \times 10^{-3}$<br>(457 nm)       | $\sim 3.0 \times 10^{-1}$ | NR                 | $2 \times 10^9$       | ~5 $\mu$ s    | S1        |
| Multi-layered SnS <sub>2</sub> | Visible         | ~108 nm/<br>5 $\mu$ m     | $V_{ds} = 10$ V                                                        | 1 mW/cm <sup>2</sup>                                          | 2<br>(450 nm)                          | $\sim 5.1 \times 10^1$    | NR                 | NR                    | ~42 ms        | S2        |
| Multi-layered GeSe             | IR              | 57 nm/<br>10 $\mu$ m      | $V_{ds} = 4$ V                                                         | 283 mW/cm <sup>2</sup>                                        | 3.5<br>(808 nm)                        | $\sim 9.4 \times 10^2$    | 530                | NR                    | 100 ms        | S3        |
| GeS nanoribbon                 | Visible         | 41 nm/<br>5 $\mu$ m       | $V_{ds} = 5$ V                                                         | 0.25 $\mu$ W/cm <sup>2</sup>                                  | 139.9<br>(530 nm)                      | $\sim 8.0 \times 10^3$    | $3.37 \times 10^4$ | NR                    | 850 ms        | S4        |
| Multi-layered GeS              | Visible         | ~28 nm/<br>13 $\mu$ m     | $V_g = 0$ V<br>$V_{ds} = 10$ V<br><br>$V_g = -80$ V<br>$V_{ds} = 10$ V | 1.5 $\mu$ W/cm <sup>2</sup><br><br>10 $\mu$ W/cm <sup>2</sup> | 206<br>(633 nm)<br><br>655<br>(633 nm) | $\sim 1.4 \times 10^4$    | $4 \times 10^4$    | $2.35 \times 10^{13}$ | ~7 ms         | This work |

$V_g$ : back gate voltage;  $V_{ds}$ : source-drain voltage;  $R_\lambda$ : photoresponsivity;  $\tau_l/\tau_t$ : ratio of carrier lifetime ( $\tau_l$ ) to transit time ( $\tau_t$ ); EQE: external quantum efficiency;  $D^*$ : specific detectivity; NR: not reported.

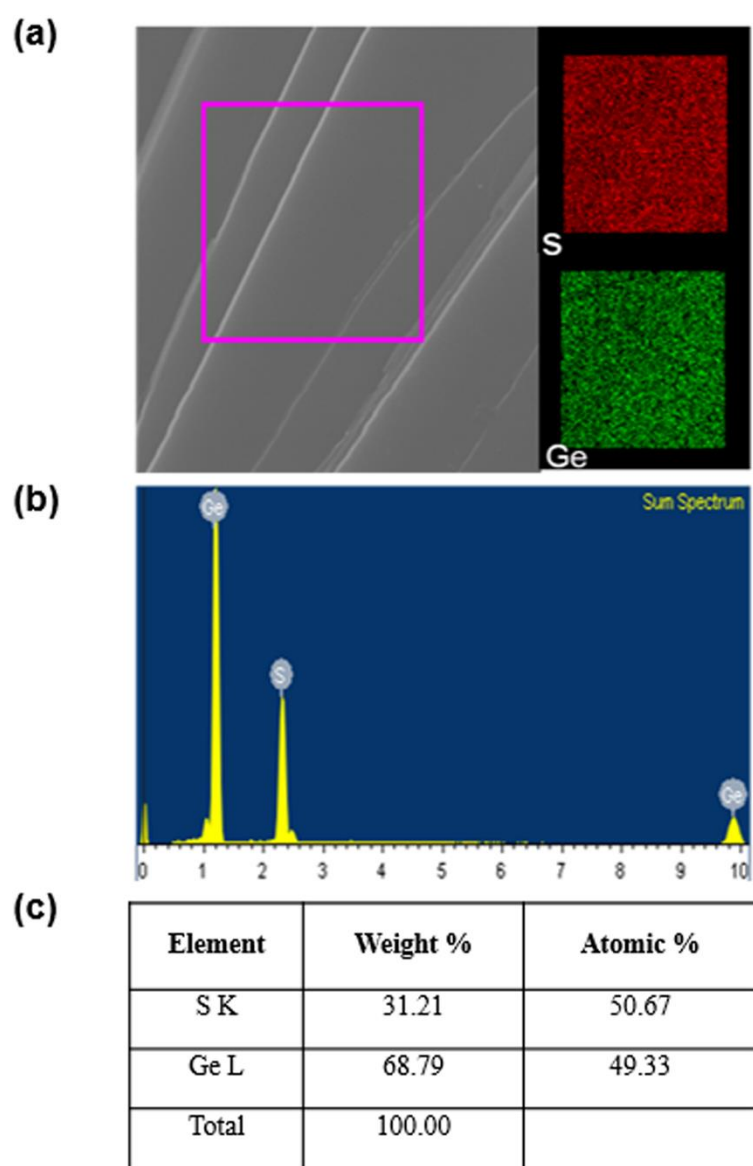

**Fig. S1** (a) Elemental mapping of the as-synthesized bulk GeS crystal. (b) EDS spectrum of the bulk GeS crystal. (c) Analysis of the weight and atomic percentages of the GeS crystal reveals the stoichiometric ratio of Ge:S of  $\sim 1:1$ .

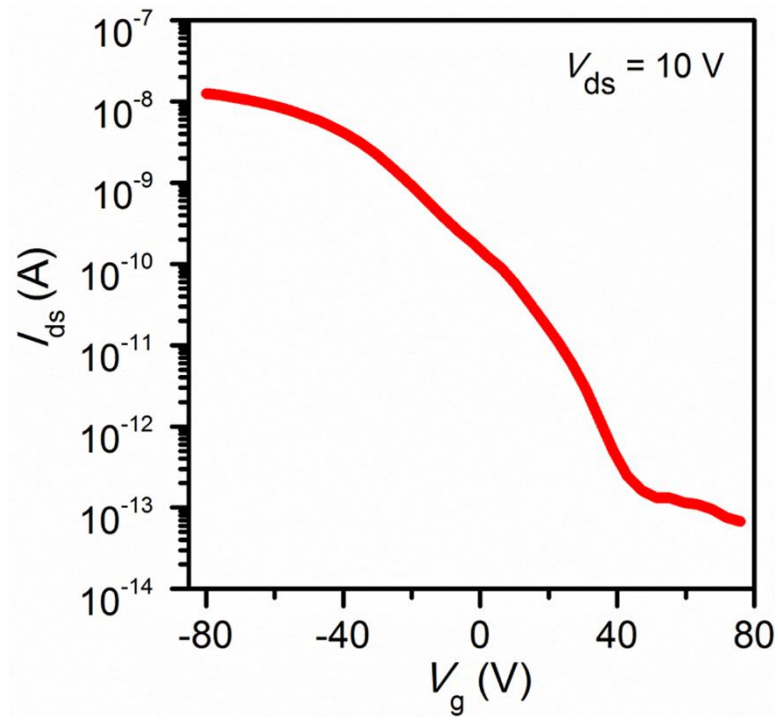

**Fig. S2** The measured  $I_{ds}$ - $V_g$  curve of a multi-layered GeS-FET indicates the on/off current ratio of  $\sim 10^5$ .

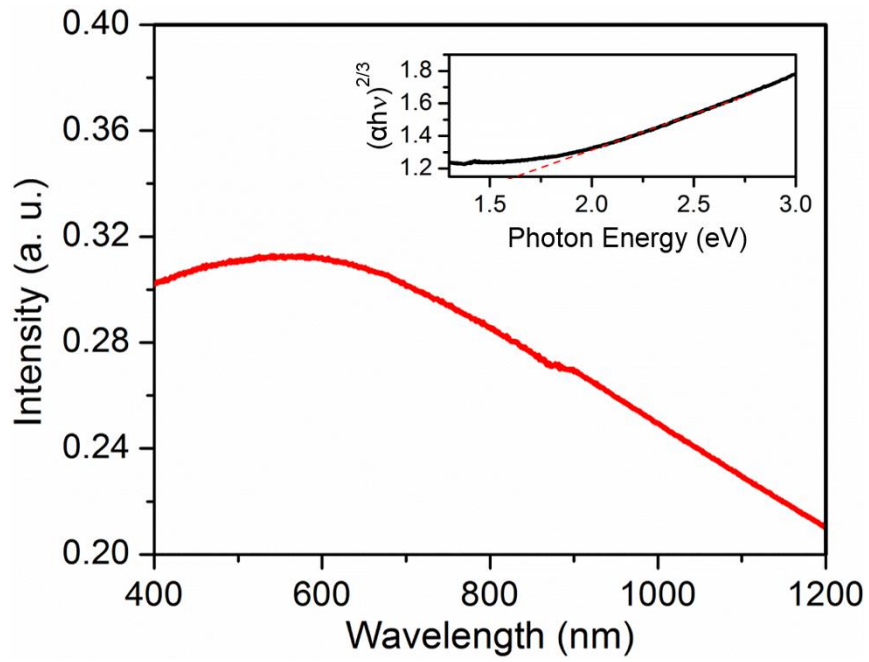

**Fig. S3** An absorption spectrum of bulk GeS crystal was observed. In the inset, the band gap of the bulk GeS crystal is estimated to be ~1.63 eV by fitting the measured data to a Tauc's plot.

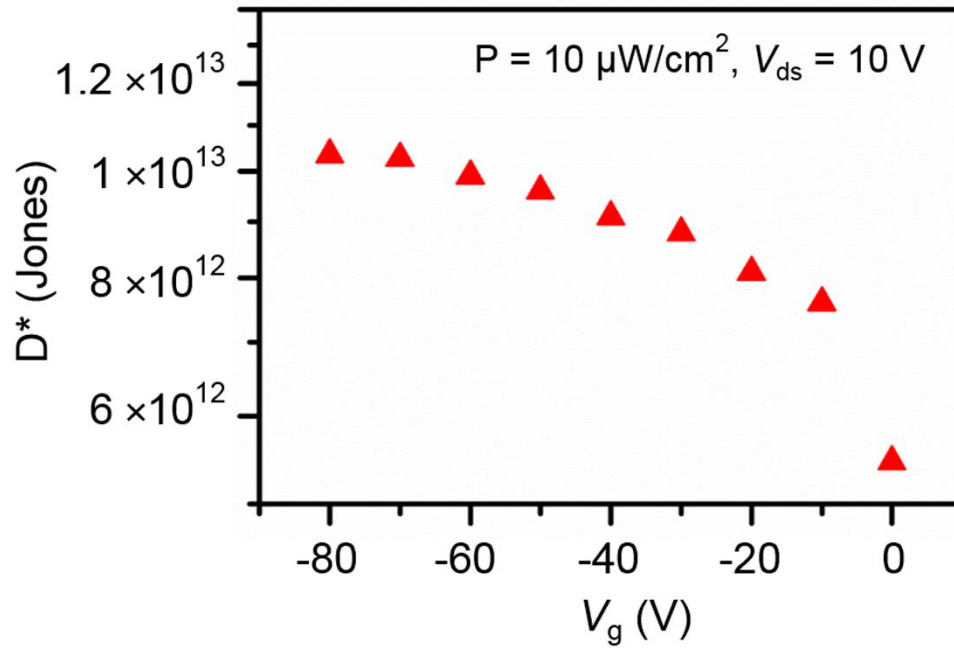

**Fig. S4**  $D^*$  of a multi-layered GeS photodetector as a function of  $V_g$  was measured at  $V_{ds} = 10 \text{ V}$  and  $P = 10 \mu\text{W}/\text{cm}^2$  at 633 nm.

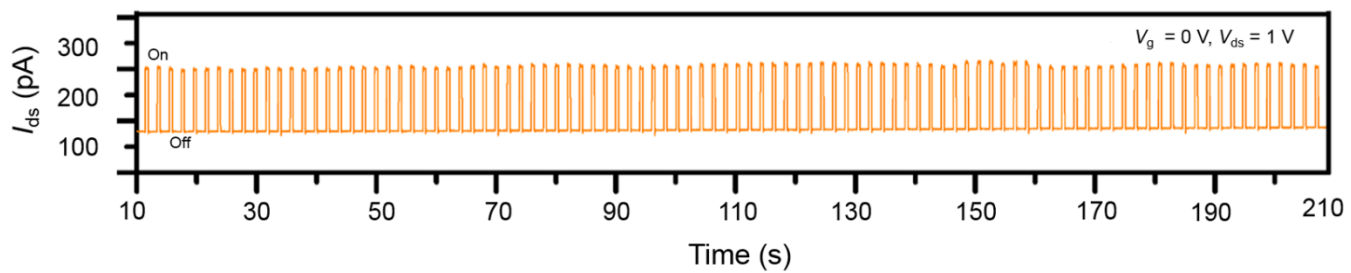

**Fig. S5** Photoswitching stability of a GeS photodetector in response to a long train (~100 cycles) of pulsed illumination at  $P = 12.7 \text{ mW/cm}^2$  ( $\lambda = 633 \text{ nm}$ ),  $V_g = 0 \text{ V}$ , and  $V_{ds} = 1 \text{ V}$ .

## REFERENCES

- S1 G. Su, V. G. Hadjiev, P. E. Loya, J. Zhang, S. Lei, S. Maharjan, P. Dong, P. M. Ajayan, J. Lou and H. Peng, *Nano Lett.*, 2015, **15**, 506.
- S2 J. Xia, D. Zhu, L. Wang, B. Huang, X. Huang and X.-M. Meng, *Adv. Funct. Mater.*, 2015, **25**, 4255.
- S3 B. Mukherjee, Y. Cai, H. R. Tan, Y. P. Feng, E. S. Tok and C. H. Sow, *ACS Appl. Mater. Interfaces*, 2013, **5**, 9594.
- S4 C. Lan, C. Li, Y. Yin, H. Guo and S. Wang, *J. Mater. Chem. C*, 2015, **3**, 8074.
